# Supplementary material for: Unusual occurrence of a DAG motif in the Ipomovirus Cassava brown streak virus and implications for its vector transmission
Source: PubMed Central journal article supplement (PMC5695790; doi:10.1371/journal.pone.0187883), 2017-11-20

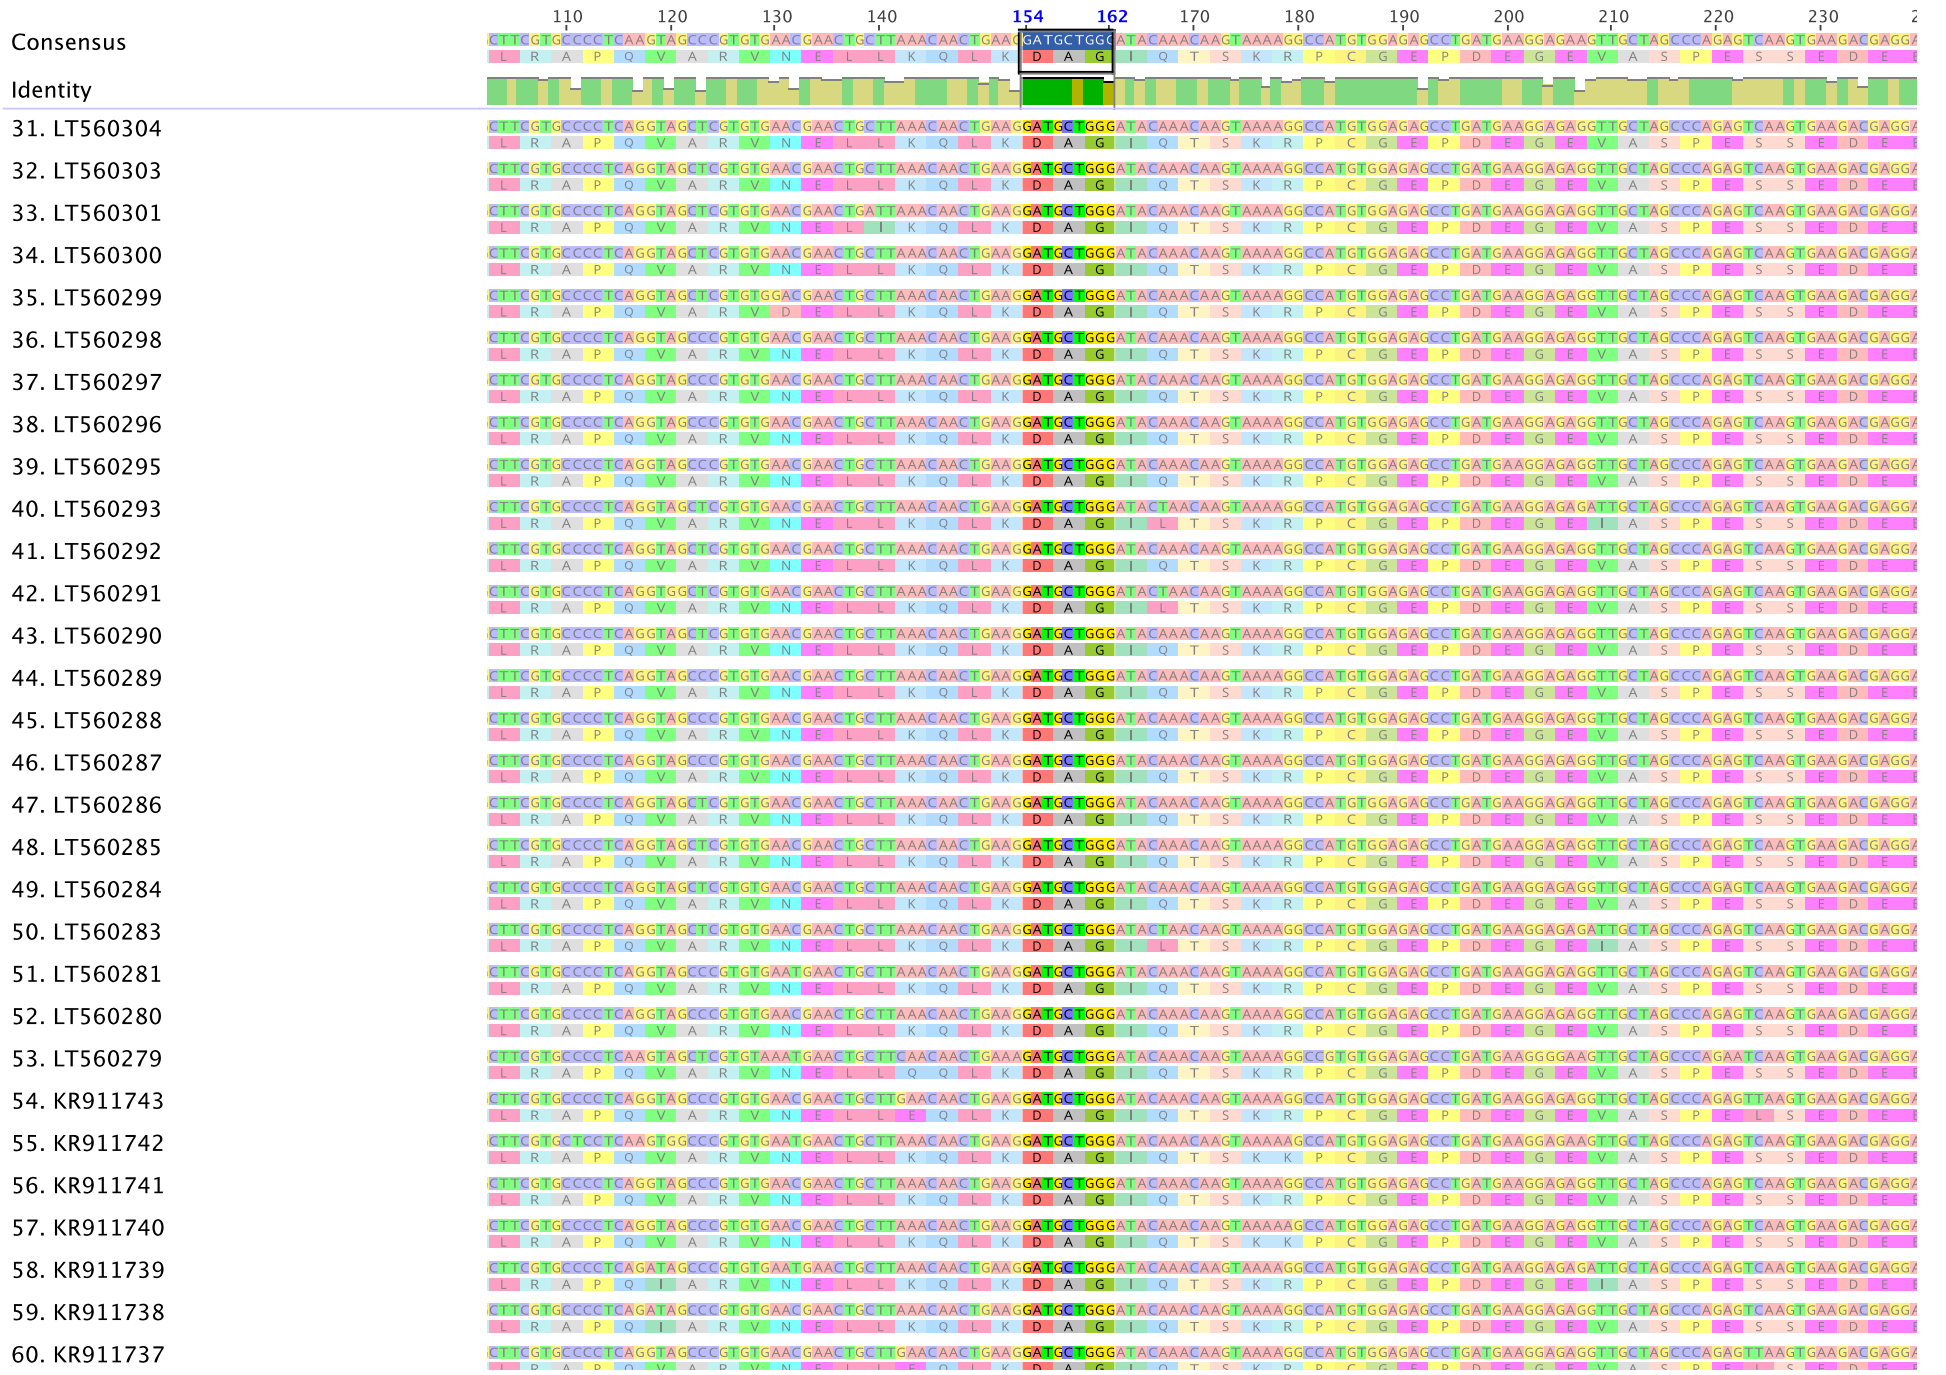

Supplement: pone.0187883.s001.pdf [file pone.0187883.s001.pdf]
